# Supplementary material for: Blueberry-Based Meals for Obese Patients with Metabolic Syndrome: A Multidisciplinary Metabolomic Pilot Study
Source: PubMed Central journal article supplement (PMC6680695; doi:10.3390/metabo9070138), 2019-07-10
Supplement: metabolites-09-00138-s001.pdf [file metabolites-09-00138-s001.pdf]

## Supplementary Material

For

# Blueberries–meals for obese patients with metabolic syndrome: a multidisciplinary metabolomic pilot study

Anatoly Petrovich Sobolev <sup>1</sup>, Alessandra Ciampa <sup>2</sup>, Cinzia Ingallina <sup>2\*</sup>, Luisa Mannina <sup>2,1\*</sup>, Donatella Capitani <sup>1</sup>, Ilaria Ernesti <sup>3</sup>, Elisa Maggi <sup>4</sup>, Rita Businaro <sup>4</sup>, Maria Del Ben <sup>5</sup>, Petra Engel <sup>6</sup>, Anna Maria Giusti <sup>3</sup>, Lorenzo M. Donini <sup>3</sup>, Alessandro Pinto <sup>3</sup>

<sup>1</sup> Istituto per i Sistemi Biologici, CNR, Laboratorio di Risonanza Magnetica “Annalaura Segre”, via Salaria km 29.300, I-00015 Monterotondo, Italia; anatoly.sobolev@cnr.it (A.P.S.); donatella.capitani@cnr.it (D.C)

<sup>2</sup> Dipartimento di Chimica e Tecnologie del Farmaco, Sapienza Università di Roma, Piazzale Aldo Moro 5, I-00185 Roma, Italia; luisa.mammia@uniroma1.it (L.M.); cinzia.ingallina@uniroma1.it (C.I.); alessandra.ciampa@uniroma1.it (A.C.)

<sup>3</sup> Sezione di Fisiopatologia Medica, Scienza dell’Alimentazione ed Endocrinologia – Dipartimento di Medicina Sperimentale, Sapienza Università di Roma, Piazzale Aldo Moro 5, I-00185 Roma, Italia; alessandro.pinto@uniroma1.it (A.P.); ilariaernesti@libero.it (I.E.); annamaria.giusti@uniroma1.it (A.M.G.); lorenzomaria.donini@uniroma1.it (L.D.)

<sup>4</sup> Dipartimento di Scienze e Biotecnologie medico–chirurgiche, Sapienza Università di Roma, Corso della Repubblica 79, 04100 Latina, Italia; rita.businaro@uniroma1.it (R.B.); elisa.maggi@uniroma1.it (E.M.)

<sup>5</sup> Dipartimento di Medicina Interna e Specialità Mediche, Policlinico Umberto 1 Sapienza Università di Roma, viale del Policlinico 151, I-00185, Roma, Italia; maria.delben@uniroma1.it (M.D.B.)

<sup>6</sup> Consiglio per la Ricerca in Agricoltura e l’Analisi dell’Economia Agraria, Ufficio Rapporti Istituzionali e Relazioni Internazionali, via Po 14, 00198 Roma, Italia; petra.engel@crea.gov.it (P.E.)

\* Correspondence: luisa.mannina@uniroma1.it (L.M.); cinzia.ingallina@uniroma1.it (C.I.)  
Tel. +39–06–4991–3735

## Table of content

**Supplementary Table S1.** Seventy five chemical shift bins and relative range (ppm) in which <sup>1</sup>H–NMR spectrum has been divided.

| <b>Bin</b> | <b>Range (ppm)</b> |
|------------|--------------------|
| V2         | 9.390–9.329        |
| V3         | 9.299–9.251        |
| V4         | 9.144–9.092        |
| V5         | 9.012–8.933        |
| V6         | 8.868–8.812        |
| V7         | 8.806–8.765        |
| V8         | 8.690–8.627        |
| V9         | 8.550–8.480        |
| V10        | 8.470–8.416        |
| V11        | 8.408–8.010        |
| V12        | 8.008–7.780        |
| V13        | 7.688–7.671        |

---

|     |             |
|-----|-------------|
| V14 | 7.670–7.616 |
| V15 | 7.586–7.526 |
| V16 | 7.453–7.402 |
| V17 | 7.388–7.346 |
| V18 | 7.336–7.308 |
| V19 | 7.308–7.286 |
| V20 | 7.285–7.257 |
| V21 | 7.224–7.139 |
| V22 | 7.138–6.953 |
| V23 | 6.940–6.905 |
| V24 | 6.905–6.888 |
| V25 | 6.886–6.852 |
| V26 | 6.852–6.836 |
| V27 | 6.684–6.669 |
| V28 | 6.669–6.636 |
| V29 | 6.621–6.592 |
| V30 | 5.521–5.285 |
| V31 | 5.285–5.229 |
| V32 | 5.229–4.894 |
| V34 | 4.472–4.423 |
| V35 | 4.093–4.042 |
| V36 | 3.989–3.954 |
| V37 | 3.583–3.565 |
| V38 | 3.458–3.447 |
| V39 | 3.447–3.421 |
| V40 | 3.376–3.357 |
| V41 | 3.301–3.261 |
| V42 | 3.238–3.221 |
| V43 | 3.214–3.187 |
| V44 | 3.174–3.137 |
| V45 | 3.130–3.106 |
| V46 | 3.075–3.024 |
| V47 | 2.945–2.914 |
| V48 | 2.884–2.865 |
| V49 | 2.743–2.718 |
| V50 | 2.718–2.697 |
| V51 | 2.695–2.671 |
| V52 | 2.571–2.545 |
| V53 | 2.544–2.518 |
| V54 | 2.492–2.428 |
| V55 | 2.428–2.415 |
| V56 | 2.415–2.401 |
| V57 | 2.401–2.386 |
| V58 | 2.365–2.318 |
| V59 | 2.297–2.246 |
| V60 | 2.210–2.167 |
| V61 | 2.115–2.014 |

---

|     |             |
|-----|-------------|
| V62 | 2.014-1.968 |
| V63 | 1.692-1.609 |
| V64 | 1.507-1.472 |
| V65 | 1.447-1.428 |
| V66 | 1.376-1.355 |
| V67 | 1.356-1.319 |
| V68 | 1.285-1.266 |
| V69 | 1.267-1.255 |
| V70 | 1.254-1.223 |
| V71 | 1.214-1.177 |
| V72 | 1.176-1.146 |
| V73 | 1.146-1.131 |
| V74 | 1.126-1.093 |
| V75 | 1.092-1.059 |
| V76 | 1.058-1.034 |
| V77 | 1.014-0.812 |

---
